# Supplementary material for: Amino acid-assisted synthesis of In2S3hierarchical architectures for selective oxidation of aromatic alcohols to aromatic aldehydes
Source: Royal Society of Chemistry journal article supplement (doi:10.1039/c6ra28560k), 2017-01-01
Supplement: c6ra28560k1.pdf [file c6ra28560k1.pdf]

## Supporting Information

### Amino acid-assisted synthesis of $\text{In}_2\text{S}_3$ hierarchical architectures for selective oxidation of aromatic alcohols to aromatic aldehydes

Tongtong Li<sup>a</sup>, Sujuan Zhang<sup>a</sup>, Sugang Meng<sup>a\*</sup>, Xiangju Ye<sup>b\*</sup>, Xianliang Fu<sup>a</sup>, Shifu

Chen<sup>a,b\*</sup>

<sup>a</sup>Department of Chemistry, Huaibei Normal University, Anhui Huaibei, 235000,

People's Republic of China.

<sup>b</sup>Department of Chemistry, University of Science and Technology of Anhui, Anhui

Fengyang, 233100, People's Republic of China.

\*To whom correspondence should be addressed. Tel: +86-561-3806611, Fax: +86-

561-3090518. E-mail: chshifu@chnu.edu.cn

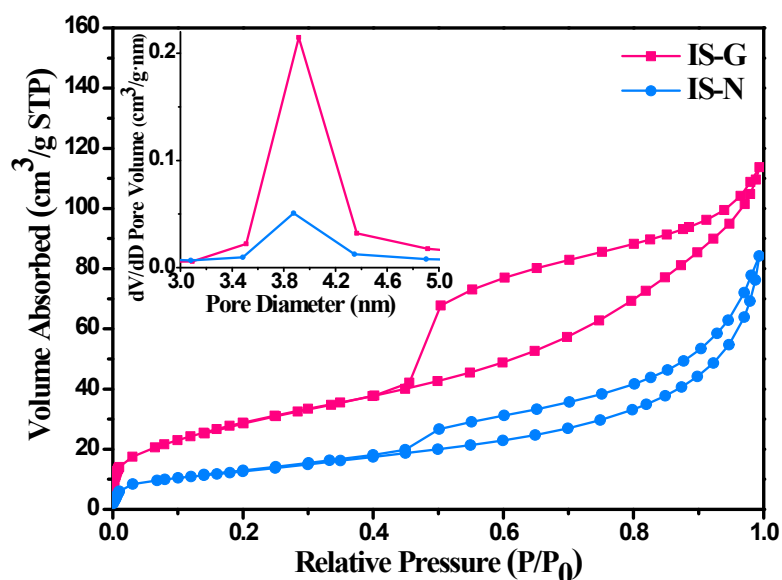

Fig. S1. Nitrogen adsorption-desorption isotherms of the IS-G and IS-N composites;

the inset is the corresponding pore diameter distribution of  $\text{In}_2\text{S}_3$  samples.

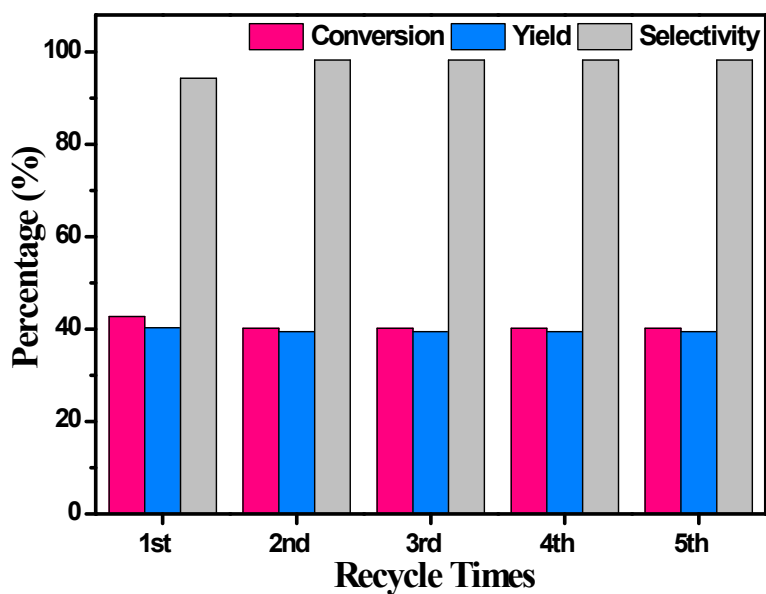

Fig. S2. Recycle experiment for photocatalytic oxidation of benzyl alcohol with IS-G catalyst under visible light irradiation for 2 h.

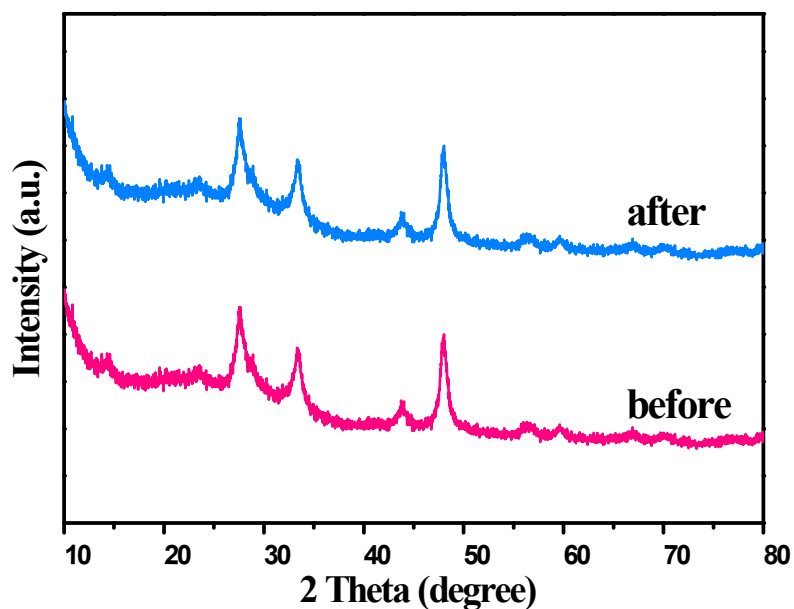

Fig. S3. XRD patterns of IS-G catalyst before and after the photocatalytic reactions.

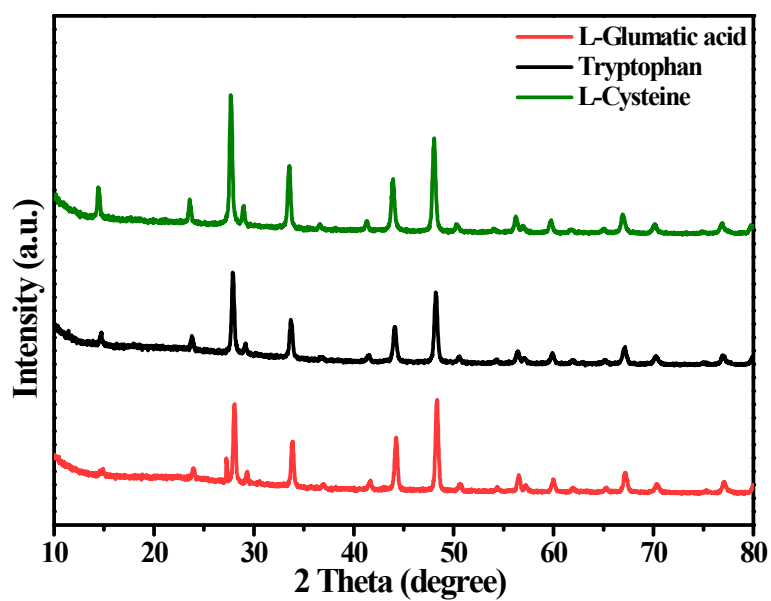

Fig. S4. XRD images of In<sub>2</sub>S<sub>3</sub> in the presence of different amino acids: L-Glutamic acid, Tryptophan, L-cysteine.

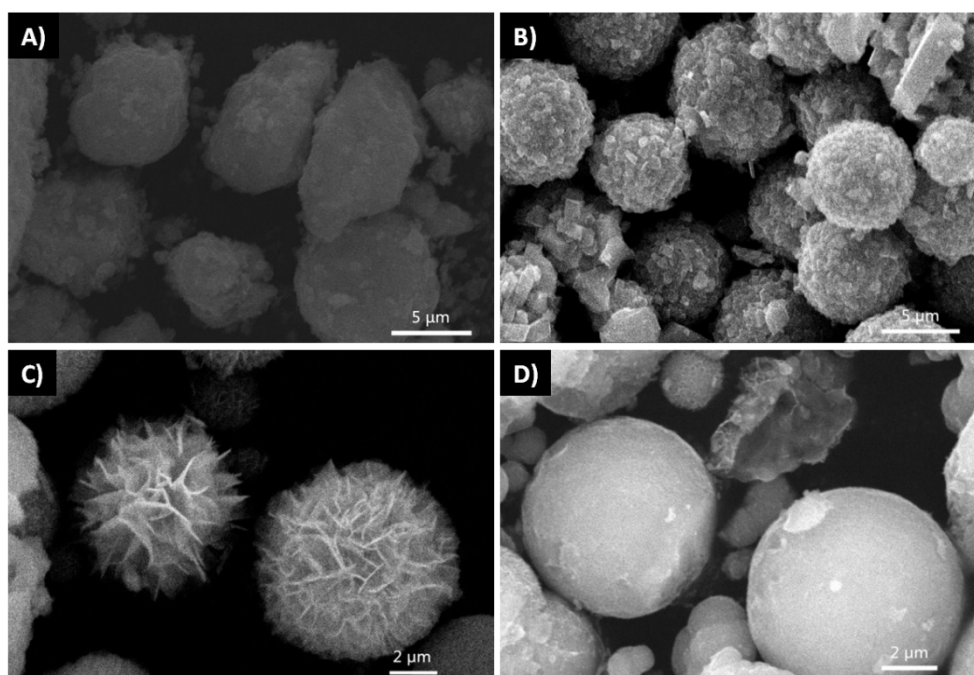

Fig. S5. FESEM images of the morphologies of In<sub>2</sub>S<sub>3</sub> in the presence of different amino acids: (A) without amino acids, (B) L-Glutamic acid, (C) Tryptophan, (D) L-cysteine.

Table S1. Molecular structures, morphology of the different amino acids used in the synthesis and the conversion rates (C) for selective oxidation of benzyl alcohol to benzaldehyde with as synthesized  $\text{In}_2\text{S}_3$  samples.

| Amino acids     | Molecular structure                                                                                                                                             | Morphology                    | C (%) |
|-----------------|-----------------------------------------------------------------------------------------------------------------------------------------------------------------|-------------------------------|-------|
| Aspartic acid   | $\begin{array}{c} \text{O} \\ \parallel \\ \text{H}_2\text{N}-\text{CH}-\text{C}-\text{OH} \\   \\ \text{CH}_2 \\   \\ \text{O}=\text{C}-\text{OH} \end{array}$ | Spheres of thick flakes       | 40    |
| Serine          | $\begin{array}{c} \text{O} \\ \parallel \\ \text{H}_2\text{N}-\text{CH}-\text{C}-\text{OH} \\   \\ \text{CH}_2 \\   \\ \text{OH} \end{array}$                   | Spheres of tiny flakes        | 30    |
| Glycine         | $\text{H}_2\text{N}-\text{CH}_2-\text{C}-\text{OH}$ $\parallel$ $\text{O}$                                                                                      | Spheres of uniform flakes     | 42    |
| L-Glutamic acid | 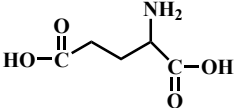                                                                             | Spheres of nanobricks         | 35    |
| Tryptophan      |                                                                              | Spheres of thin flakes        | 32    |
| L-cysteine      | $\begin{array}{c} \text{O} \\ \parallel \\ \text{H}_2\text{N}-\text{CH}-\text{C}-\text{OH} \\   \\ \text{CH}_2 \\   \\ \text{SH} \end{array}$                   | Spheres with slippery surface | 30    |
